# Supplementary material
Source: PubMed Central journal article supplement (PMC5924894)
Supplement: pnas.201717700SI.pdf [file pnas.201717700SI.pdf]

# Supporting Information

Hu et al. 10.1073/pnas.1717700115

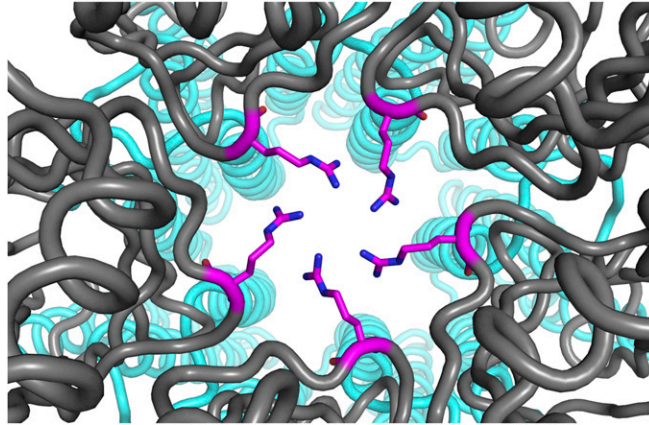

Movie S1. Top view of mode 10.

[Movie S1](#)

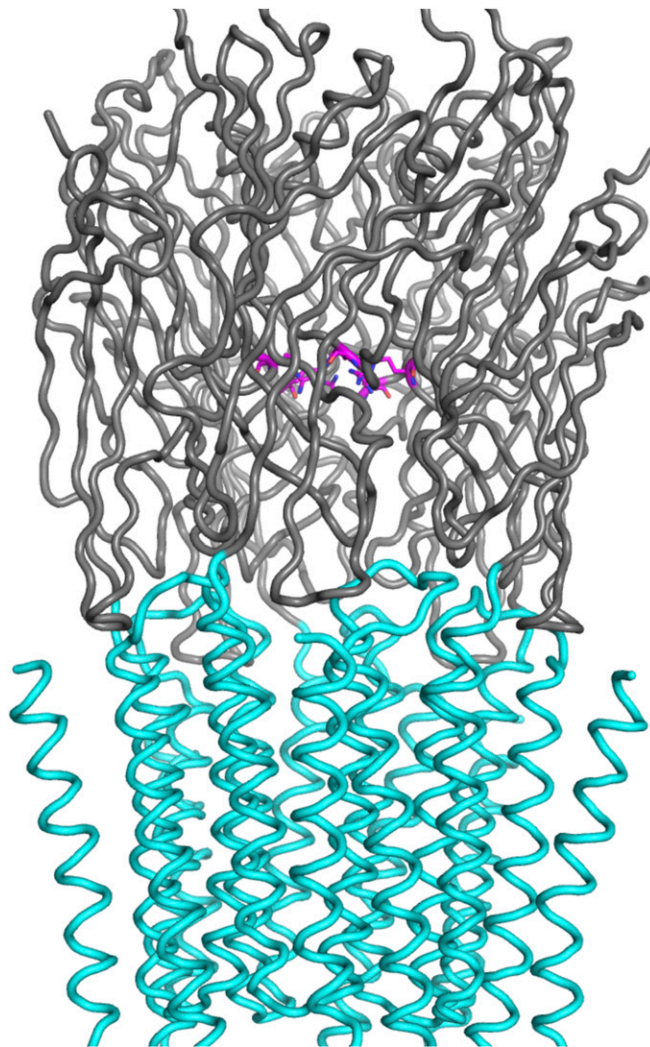

Movie S2. Side view of mode 10.

[Movie S2](#)

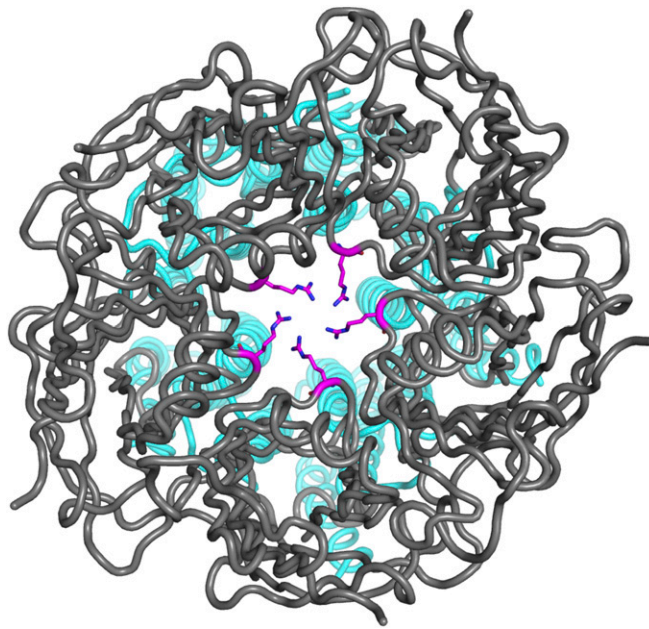

**Movie S3.** Top view of mode 18.

[Movie S3](#)

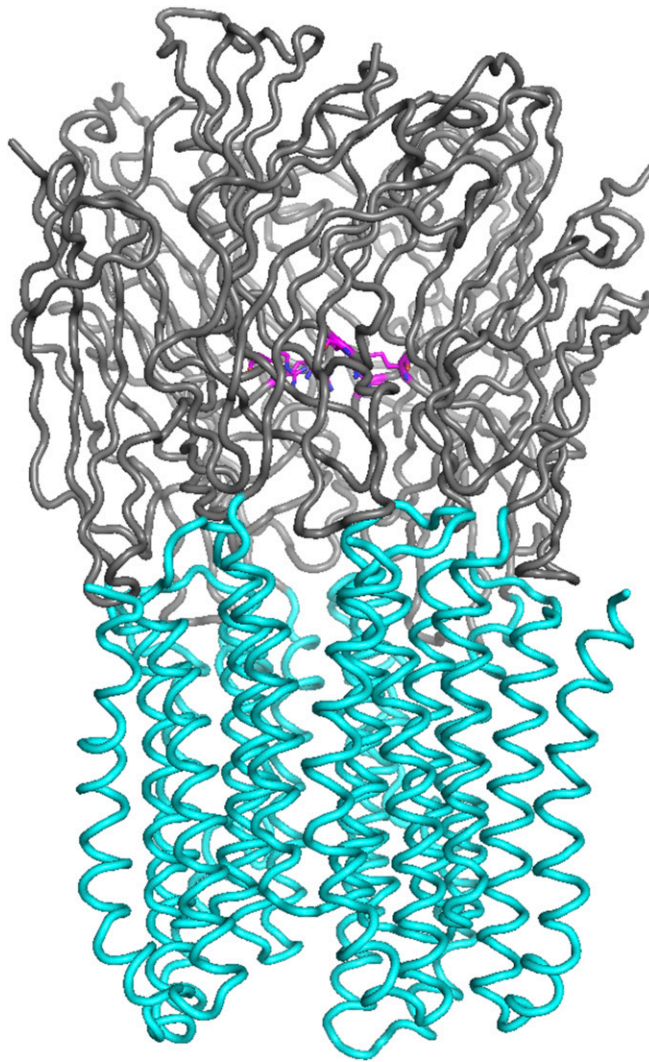

Movie S4. Side view of mode 18.

[Movie S4](#)

## Other Supporting Information Files

[SI Appendix \(PDF\)](#)
